# Supplementary material for: Differentiation of β-phosphorylated nitroxide diastereoisomers by complexation with cyclodextrins: an EPR and cyclic voltammetry study
Source: Royal Society of Chemistry journal article supplement (doi:10.1039/d6ra00820h), 2026-04-24
Supplement: d6ra00820h1.pdf [file d6ra00820h1.pdf]

**Differentiation of  $\beta$ -phosphorylated nitroxide diastereoisomers by complexation with cyclodextrins: an EPR and cyclic voltammetry study**

Alexandru Gabriel Bucur<sup>a</sup>, Nicolae Spataru<sup>a</sup>, Sylvain Marque<sup>ab</sup>, Loredana Preda<sup>a</sup>, Jean Patrick Joly<sup>ab</sup>, Gerard Audran<sup>b</sup>, Mathilde Trapp<sup>b</sup>, Tanta Spataru<sup>a</sup>, Florenta Savonea<sup>a</sup>, Gabriela Ionita<sup>a</sup>.

<sup>1</sup> "Ilie Murgulescu" Institute of Physical Chemistry of the Romanian Academy, 202 Splaiul Independentei, Bucharest 060021, Romania

<sup>2</sup> Aix Marseille Univ., CNRS, ICR, UMR 7273, Case 551, Avenue Escadrille Normandie-Niemen, 13397, Marseille Cedex 20, France

E-mails:

[abucur@icf.ro](mailto:abucur@icf.ro) (A.G.B.)

[npataru@icf.ro](mailto:npataru@icf.ro) (N.S.)

[sylvain.marque@univ-amu.fr](mailto:sylvain.marque@univ-amu.fr) (S.R.A.M.)

[predalore@yahoo.com](mailto:predalore@yahoo.com) (L.P.)

[jean-patrick.joly@univ-amu.fr](mailto:jean-patrick.joly@univ-amu.fr) (J.P.J.)

[g.audran@univ-amu.fr](mailto:g.audran@univ-amu.fr) (G.A.)

[mathilde.trapp@uni-amu.fr](mailto:mathilde.trapp@uni-amu.fr) (M.T.)

[tspataru@icf.ro](mailto:tspataru@icf.ro) (T.S.)

[fsavonea@icf.ro](mailto:fsavonea@icf.ro) (F.S.)

[gabi2ionita@yahoo.com](mailto:gabi2ionita@yahoo.com) (G.I.)

**Table S1.** Isotropic hyperfine coupling constants of 1c• and proportions of free and complexed species obtained by spectral simulation

| [β-CD]<br>(M)        | Free 1c•                                 |       | Complex<br>1c•/β-CD                      |       | [γ-CD]<br>(M)        | Free 1c•                                 |       | Complex<br>1c•/γ-CD                      |       |
|----------------------|------------------------------------------|-------|------------------------------------------|-------|----------------------|------------------------------------------|-------|------------------------------------------|-------|
|                      | a <sub>N</sub> (G)<br>a <sub>P</sub> (G) | %     | a <sub>N</sub> (G)<br>a <sub>P</sub> (G) | %     |                      | a <sub>N</sub> (G)<br>a <sub>P</sub> (G) | %     | a <sub>N</sub> (G)<br>a <sub>P</sub> (G) | %     |
| 0                    | 15.06<br>44.92                           | 100   | -                                        | 0     | 0                    | 15.06<br>44.92                           | 100   | -                                        | 0     |
| 5×10 <sup>-4</sup>   | 15.06<br>44.92                           | 97.76 | 14.57<br>44.31                           | 2.24  | 5×10 <sup>-4</sup>   | 15.07<br>44.94                           | 93.57 | 14.40<br>46.41                           | 6.43  |
| 10 <sup>-3</sup>     | 15.06<br>44.93                           | 95.35 | 14.56<br>44.33                           | 4.65  | 10 <sup>-3</sup>     | 15.07<br>44.92                           | 87.62 | 14.38<br>46.42                           | 12.38 |
| 2.5×10 <sup>-3</sup> | 15.06<br>44.92                           | 88.59 | 14.59<br>44.31                           | 11.41 | 2.5×10 <sup>-3</sup> | 15.06<br>44.92                           | 73.88 | 14.38<br>46.42                           | 26.12 |
| 5×10 <sup>-3</sup>   | 15.07<br>44.92                           | 80.39 | 14.56<br>44.31                           | 19.61 | 5×10 <sup>-3</sup>   | 15.06<br>44.92                           | 58.67 | 14.41<br>46.40                           | 41.33 |
| 7.5×10 <sup>-3</sup> | 15.06<br>44.93                           | 73.16 | 14.56<br>44.32                           | 26.84 | 7.5×10 <sup>-3</sup> | 15.08<br>44.92                           | 49.82 | 14.39<br>46.42                           | 50.18 |
| 10 <sup>-2</sup>     | 15.08<br>44.92                           | 68.51 | 14.56<br>44.31                           | 31.49 | 10 <sup>-2</sup>     | 15.06<br>44.93                           | 40.79 | 14.38<br>46.42                           | 59.21 |
| 5×10 <sup>-2</sup>   | -                                        | -     | -                                        | -     | 5×10 <sup>-2</sup>   | 15.06<br>44.92                           | 12.59 | 14.38<br>46.42                           | 87.41 |

**Table S2.** Isotropic hyperfine coupling constants of 1t• and proportions of free and complexed species obtained by spectral simulation

| [β-CD]<br>(M)        | Free 1t•                                 |       | Complex<br>1t•/β-CD                      |       | [γ-CD]<br>(M)        | Free 1t•                                 |       | Complex<br>1t•/γ-CD                      |       |
|----------------------|------------------------------------------|-------|------------------------------------------|-------|----------------------|------------------------------------------|-------|------------------------------------------|-------|
|                      | a <sub>N</sub> (G)<br>a <sub>P</sub> (G) | %     | a <sub>N</sub> (G)<br>a <sub>P</sub> (G) | %     |                      | a <sub>N</sub> (G)<br>a <sub>P</sub> (G) | %     | a <sub>N</sub> (G)<br>a <sub>P</sub> (G) | %     |
| 0                    | 14.77<br>47.75                           | 100   | -                                        | 0     | 0                    | 14.77<br>47.75                           | 100   | -                                        | 0     |
| 5×10 <sup>-4</sup>   | 14.77<br>47.74                           | 97.86 | 14.11<br>48.33                           | 2.14  | 5×10 <sup>-4</sup>   | 14.78<br>47.74                           | 96.58 | 14.11<br>52.42                           | 3.42  |
| 10 <sup>-3</sup>     | 14.78<br>47.75                           | 95.52 | 14.11<br>48.32                           | 4.48  | 10 <sup>-3</sup>     | 14.77<br>47.75                           | 93.28 | 14.10<br>52.42                           | 6.72  |
| 2.5×10 <sup>-3</sup> | 14.77<br>47.72                           | 89.87 | 14.11<br>48.33                           | 10.13 | 2.5×10 <sup>-3</sup> | 14.77<br>47.72                           | 84.91 | 14.09<br>52.41                           | 15.09 |
| 5×10 <sup>-3</sup>   | 14.77<br>47.75                           | 82.64 | 14.11<br>48.33                           | 17.36 | 5×10 <sup>-3</sup>   | 14.77<br>47.75                           | 73.26 | 14.09<br>52.39                           | 26.74 |
| 7.5×10 <sup>-3</sup> | 14.79<br>47.75                           | 75.27 | 14.11<br>48.33                           | 24.73 | 7.5×10 <sup>-3</sup> | 14.77<br>47.75                           | 65.12 | 14.10<br>52.42                           | 34.88 |
| 10 <sup>-2</sup>     | 14.77<br>47.73                           | 70.35 | 14.11<br>48.31                           | 29.65 | 10 <sup>-2</sup>     | 14.78<br>47.75                           | 57.81 | 14.09<br>52.42                           | 42.19 |
| 5×10 <sup>-2</sup>   | -                                        | -     | -                                        | -     | 5×10 <sup>-2</sup>   | 14.77<br>47.75                           | 21.79 | 14.09<br>52.42                           | 78.21 |
